**Erratum** for Youngmin Choe, “Paris in Korean Cinema: Fraudulence and the Female Form in Hong Sang-soo’s *Night and Day* and Kim Ki-duk’s *Wild Animals*,” *positions* 31, no. 1 (2022): 299–54.

Mariah Devereux Herbeck was misspelled as Mariah Deveraux Herbeck on page 251, in the notes on page 252, and in the references on page 253. These errors have been corrected in the print and online versions of this article.

<https://doi.org/10.1215/10679847-10122203>
